# Supplementary material for: ARL13B regulates Sonic hedgehog signaling from outside primary cilia
Source: eLife. 2020 Mar 4;9:e50434. doi: 10.7554/eLife.50434 (PMC7075693; doi:10.7554/eLife.50434)
Supplement: Figure 2—source data 1. [file elife-50434-fig2-data1.xlsx]

## Sheet: Sheet3
Genotype	.+/+	.A/+	.A/A
Run 1	73403791	54423139	4.07291e+07
Run 2	65356999	62457294	45033580
Run 3	52886978	61678680	3.42433e+07
Avg	6.38826e+07	5.95197e+07	40001993
Ratio	1	0.931705	0.62618
