# Supplementary material for: ARL13B regulates Sonic hedgehog signaling from outside primary cilia
Source: eLife. 2020 Mar 4;9:e50434. doi: 10.7554/eLife.50434 (PMC7075693; doi:10.7554/eLife.50434)
Supplement: Figure 3—source data 1. [file elife-50434-fig3-data1.xlsx]

## Sheet: Quantification by eye
	Genotype				Genotype				Genotype
Antibody	.+/+	# of Cells	# of cilia	# of Arl13b positive Cilia	.A/+	# of Cells	# of cilia	# of Arl13b positive Cilia	A/A	# of Cells	# of cilia	# of Arl13b positive Cilia
Protein Tech		94	67	65		122	85	76		75	38	0
		93	60	60		133	86	78		101	43	0
		100	82	79						69	32	0
										87	41	0
	Total	287	209	204		255	171	154		332	154	0
Caspary 505		164	106	106		104	83	77		155	87	0
		147	123	117		121	88	70		166	77	0
	Total	311	229	223		225	171	147		321	164	0
Caspary 504		66	33	32
		56	25	24
		64	38	38						88	35	0
		59	37	35						105	34	0
		47	19	18		166	159	148		121	29	0
	Total	292	152	147		166	159	148		314	98	0
Caspary 503		124	112	110		166	159	148		107	42	0
		159	125	123		166	159	148		113	51	0
	Total	283	237	233		197	144	134		220	93	0
NeuroMab						40	22	22		14	5	0
		61	44	44		43	29	29		13	5	0
		2	2	2		12	9	9		20	15	0
		12	9	9		50	30	30
	Total	75	55	55		145	90	90		47	25	0

## Sheet: IFT88 
ift88 actub 1	1233.8	951	1.29737		ift88 actub 1	766.625	627.188	1.22232		ift88 actub 1	1502.36	1254.43	1.19764
	584.5	477.188	1.22488			839.5	563.652	1.48939			1660.88	937.2	1.77217
	322.75	287.75	1.12163			1072.08	590	1.81709			1825.06	1414.33	1.2904
	241.44	214.72	1.12444			1564.25	1389	1.12617			2833.12	2108.88	1.34343
	422.417	290.5	1.4541			191.2	164.367	1.16325			1151.48	788.19	1.46091
	443.333	282.5	1.56932			452.767	385.033	1.17592			1818.93	1385.25	1.31307
	1521.11	754.111	2.01709			613.222	479.667	1.27843			1812.17	1321.33	1.37147
	340.92	230.68	1.47789			1654.32	951.56	1.73853			1498.44	1131.94	1.32378
	570.188	367.125	1.55312			725.875	560.321	1.29546			1253.33	853.472	1.46851
	858.562	596.938	1.43828			1140.45	710.5	1.60514			1823.38	1554.06	1.1733
	895.5	501.583	1.78535			1808.9	1156.6	1.56398			1793.6	1083.8	1.65492
	555.188	440.938	1.25911			997.031	602.344	1.65525			855.125	653.312	1.30891
	751.25	568.875	1.32059			1448.88	1096.06	1.32189			2625.4	1922.6	1.36555
	927.8	581.2	1.59635			1332.92	979.2	1.36123			893.222	762.222	1.17187
	1155.67	715	1.61632			1689	1239.07	1.36312			1101.55	802.05	1.37342
	1127.5	683.438	1.64975			1202.23	1018.9	1.17993			945.733	913.733	1.03502
	1243.92	896.417	1.38765			641.1	545.75	1.17471			1448.45	1129.9	1.28193
	1168.67	817.889	1.42888			918.98	795.082	1.15583			1558	1214	1.28336
	691.111	606.889	1.13878			1243.08	1107.58	1.12234			1500	1455.83	1.03034
						904.72	630.64	1.43461			957.333	716.583	1.33597
						326.08	234.96	1.38781			1590.52	951.36	1.67184
						730.65	682.9	1.06992			1323.66	1280.17	1.03397
											1215.56	985.84	1.23302
CiliobrevinD					CiliobrevinD					CBD
67.9	IFT88	bckg	ratio		67.7	IFT88	bckg	ratio		67.3	IFT88	bckg	ratio
ift88 actub 1	637.812	465.625	1.3698		ift88 actub 1	506.72	291.28	1.73963		ift88 actub 1	872.917	420.667	2.07508
	641.938	380.375	1.68765			616.933	204.667	3.01433			697.444	367.667	1.89694
	769.444	393.111	1.95732			623.5	399.333	1.56135			1902.69	1069.19	1.77956
	775.05	583.75	1.32771			772.833	415	1.86225			1016.89	403.444	2.52052
	1218.85	402.15	3.03083			333.133	265.6	1.25427			1224.5	474.062	2.583
	1266.5	643.583	1.96789			351.167	319.667	1.09854			1380.12	581.083	2.37509
	818.067	511.067	1.6007			893.367	395.033	2.2615			876.5	352.188	2.48873
	1224.5	704.333	1.73852			716.188	396.5	1.80627			921.15	670.45	1.37393
	1667.73	772.267	2.15953			653.167	389.167	1.67837			1026.25	678.688	1.51211
	991.889	572.667	1.73205		2	626.833	367.417	1.70605			1804.06	711.694	2.53488
	1291.11	743.611	1.73627			516.133	422.633	1.22123			573.7	348.95	1.64408
	1469.81	818.952	1.79474			707.5	323.6	2.18634			1119.44	610.688	1.83308
	613.938	324.438	1.89231			465	217.48	2.13813			1184.4	507.4	2.33425
	677.444	330.222	2.05148			438.786	428.952	1.02293			904.668	425	2.12863
	820.208	440.125	1.86358			828.125	331.125	2.50094			824.083	589.167	1.39873
	787.083	558.25	1.40991			878.688	523.5	1.67849			169.778	157.889	1.0753
	788.7	454.25	1.73627			453.35	246.3	1.84064			795.139	476	1.67046
	1827.8	815.9	2.24023			778.4	481.88	1.61534			547.694	310.556	1.76359
						591.2	297.64	1.98629			577.361	368.194	1.56809

## Sheet: Gli3
Wildtype					A/+					A/A					Wildtype					A/+					A/A
File Name	Gli3	Bckg	Ratio		File Name	Gli3	Bckg	Ratio		File Name	Gli3	Bckg	Ratio		File Name	Gli3	Bckg	Ratio		File Name	Gli3	Bckg	Ratio		File Name	Gli3	Bckg	Ratio
CONTROL	3850	2553	1.50803		CONTROL	2787	814	3.42383		CONTROL	2115	1611	1.31285		Ciliobrevin	740	386	1.9171		Ciliobrevin	1706	1055	1.61706		Ciliobrevin	1377	1293	1.06497
67.9 (1)	2574	1851	1.3906		67.7 (1)	1162.25	682	1.70418		67.3(1)	3264	2526	1.29216		67.9 (1)	2278	1573	1.44819		67.7 (1)	3148	2119	1.48561		67.3 (1)	773	532	1.45301
	3963.5	2254.38	1.75814			1631	1345	1.21264			2171	1584	1.37058			3619	2595	1.39461			2547	1275	1.99765			1322	747	1.76975
	2844	2281	1.24682			727	559	1.30054			3536	3053	1.15821			3916	2525	1.55089			1131	707	1.59972			1938	1126	1.72114
	3192	2285	1.39694			1625	1359	1.19573		67.3 (2)	1646	1075	1.53116			3291	2434	1.3521			1388	1170	1.18632			1806	1300	1.38923
	1683	1352	1.24482			858	671	1.27869			2264	1835	1.23379			4076	3449	1.18179			1706	1091	1.5637			842	509	1.65422
	4004	3474	1.15256			1215	827	1.46917			2631	2415	1.08944			4024	3529	1.14027			2911	2012	1.44682			2738	1845	1.48401
	3169	2479	1.27834			1257	917	1.37077			2113	2044	1.03376			3042	2051	1.48318			1006	696	1.4454			2269	1835	1.23651
	3454	1873	1.8441			2522	1606	1.57036			3631	3012	1.20551			3805	2377	1.60076			2597	1399	1.85633		67.3 (2)	1575	705	2.23404
	4095	3614	1.13309			2013	1518	1.32609			1866	1573	1.18627			2747	2207	1.24468			4039	3232	1.24969			1716	1130	1.51858
	3833	2896	1.32355			2347	1722	1.36295			3229	2766	1.16739			3158	2089	1.51173		67.7 (2)	1151	783	1.46999			2152	1774	1.21308
	3284	2273	1.44479			1599	1351	1.18357		67.3 (3)	1855	1475	1.25763			3003	2342	1.28224			818	521	1.57006			1166	985	1.18376
	2907	2506	1.16002			1526	894	1.70694			1863	1417	1.31475			3965	3299	1.20188			2133	1653	1.29038			840	422	1.99052
	1618	1395	1.15986			1747	1193	1.46438			2961	1710	1.73158			2871	1861	1.54272			4015	3312	1.21226			903	772	1.16969
	1327	936	1.41774			1337	1033	1.29429			2160	1503	1.43713			1564	918	1.7037			1642	1209	1.35815			1183	528	2.24053
	3979	3180	1.25126			2101	1685	1.24688			2193	1585	1.3836			3654	2354	1.55225			1949	847	2.30106			1349	746	1.80831
67.9 (2)	2806	1653	1.69752			1889	1230	1.53577			2491	1649	1.51061			3298	1946	1.69476			2893	2052	1.40984			1100	628	1.75159
	3442	2379	1.44683			2243	1654	1.35611			1568	1341	1.16928			1730	1236	1.39968			2386	1740	1.37126			312	132	2.36364
	4072	3279	1.24184			1922	1337	1.43755		67.3 (4)	2123	1388	1.52954			3177	2200	1.44409			2105	1658	1.2696			1545	1006	1.53579
	3899	3159	1.23425			1679	1216	1.38076			2958	2428	1.21829			1870	1749	1.06918		67.7 (3)	2524	1908	1.32285			788	569	1.38489
	3267	2179	1.49931			1595	1032	1.54554			3385	2803	1.20763			3003	2059	1.45847			3093	1837	1.68372		67.3 (3)	1415	1198	1.18114
	3227	2516	1.28259			2131	1863	1.14385			1845	1615	1.14241			1071	694	1.54323			2639	2016	1.30903			1714	1075	1.59442
	3150	2190	1.43836			2717	1932	1.40631			1806	1465	1.23276			2981	1534	1.94329			1571	810	1.93951			2027	1786	1.13494
	3603	2408	1.49626		67.7 (2)	1938	1324	1.46375			1969	1714	1.14877			2282	910	2.50769			1109	514	2.15759			1345	909	1.47965
	4027	3089	1.30366			1793	1411	1.27073			2115	1570	1.34713			2936	1352	2.1716			1900	1732	1.097			1919	1521	1.26167
	3942	3557	1.10824			1483	1234	1.20178			2067	1923	1.07488			1879	910	2.06484			1103	647	1.70479			1224	881	1.38933
	4095	3371	1.21477			1076	830	1.29639			3531	2947	1.19817			2685	2207	1.21658			2383	1551	1.53643			785	467	1.68094
	2729	1751	1.55854			1136	939	1.2098		67.3 (5)	1202	1054	1.14042			2291	1451	1.57891			2477	1612	1.5366			451	237	1.90295
	3305	2685	1.23091			800	643	1.24417			2261	1887	1.1982			2342	1720	1.36163			1981	1015	1.95172		67.3 (4)	1166	837	1.39307
	3485	2299	1.51588			1559	835	1.86707			1591	1266	1.25671			1479	1155	1.28052			3011	1981	1.51994			1175	1044	1.12548
67.9 (3)	3931	3244	1.21178			1985	1818	1.09186			1104	900	1.22667			720	451	1.59645			3781	3199	1.18193			1329	712	1.86657
	3752	3234	1.16017			1910	1861	1.02633			1753	1637	1.07086			1453	883	1.64553			2248	1699	1.32313			995	637	1.56201
	3399	2525	1.34614			1759	1630	1.07914			1338	957	1.39812			3033	2024	1.49852			854	642	1.33022			1095	760	1.44079
	2904	2163	1.34258			2635	2009	1.3116			1195	1078	1.10853								1898	1555	1.22058			1524	1067	1.4283
	3014	2450	1.2302			2145	1377	1.55773			1569	1177	1.33305								2963	1879	1.5769			1307	925	1.41297
	3162	2278	1.38806			2746	2095	1.31074			1604	975	1.64513								2488	1777	1.40011			2006	1557	1.28838
	3933	3113	1.26341			2673	2263	1.18118		67.3 (6)	3374	2589	1.30321								2679	1038	2.58092			1246	928	1.34267
	4047	3568	1.13425		67.7 (3)	1915	1628	1.17629			1992	1628	1.22359								2983	2410	1.23776		67.3 (5)	2579	1657	1.55643
	2771	1747	1.58615			2248	1870	1.20214			2724	1986	1.3716							67.7 (4)	1605	1102	1.45644			1867	1347	1.38604
	3442	2391	1.43957			1460	1187	1.22999			1876	1500	1.25067								1887	1303	1.4482			1968	1338	1.47085
	2614	1768	1.47851			2938	2187	1.34339			2148	1122	1.91444								2821	2057	1.37141			1370	1074	1.27561
	n=	41	1.35513			n=	41	1.38978			n=	41	1.29089			n=	33	1.53282			n=	41	1.52653			n=	41	1.52052

## Sheet: Protein Tech
Treament	Genotype	Cells	Cilia	Arl13b pos	% Arl13b pos
Ciliobrevin	.+/+	88	49	45	91.8367
		92	41	40	97.561
		62	22	18	81.8182				DSMO	30mM CB
	sum	242	112	103	91.9643			Arl13b+/+	122 (129)	103 (112)
								Arl13bV358A/+	112 (126)	119 (129)
	A/+	50	21	20	95.2381			Arl13bV358A/V358A	0 (131)	0 (118)
		40	23	19	82.6087				Arl13b + cilia (Tota cilia)
		37	19	19	100
		51	27	26	96.2963
		73	39	35	89.7436
	sum	251	129	119	92.2481
	A/A	57	28	0	0
		64	35	0	0
		51	25	0	0
		68	30	0	0
	sum	240	118	0	0
DMSO	.+/+	58	37	36	97.2973
		71	48	48	100
		80	44	38	86.3636
	sum	209	129	122	94.5736
	A/+	44	27	23	85.1852
		43	30	23	76.6667
		71	36	35	97.2222
		53	33	31	93.9394
	sum	211	126	112	88.8889
	A/A	126	67	0	0
		120	64	0	0
	sum	246	131	0	0

## Sheet: NeuroMab
CONTROL				CILIOBREVIN
Genotype	# Cilia	# Arl13b+ Cilia		Genotype	# Cilia	# Arl13b+ Cilia				DMSO	30mM CB
A/A	9	0		A/A	11	0			Arl13b+/+	91 (94)	100 (113)
	10	0			32	0			Arl13bV358A/+	96 (107)	94 (99)
	11	0			27	0			Arl13bV358A/V358A	0 (77)	0 (111)
	22	0			17	0				Arl13b + cilia (Tota cilia)
	25				24	0
Total	77	0		Total	111	0
A/+	21	16		A/+	23	20
	23	20			23	21
	28	25			14	14
	35	35			23	23
					16	16
Total	107	96		Total	99	94
.+/+	13	12		.+/+	21	18
2	20	20			23	19
3	19	19			55	49
4	22	21			14	14
5	20	19
Total	94	91		Total	113	100
