# Supplementary material for: ARL13B regulates Sonic hedgehog signaling from outside primary cilia
Source: eLife. 2020 Mar 4;9:e50434. doi: 10.7554/eLife.50434 (PMC7075693; doi:10.7554/eLife.50434)
Supplement: Figure 5—source data 1. [file elife-50434-fig5-data1.xlsx]

## Sheet: Gli2
.+/+	Cilia	Bckg	Rato		A/+	Cilia	Bckg	Rato		A/A	Cilia	Bckg	Rato		hennin	Cilia	Bckg	Rato
Gli2 (1)	555.81	358.143	1.55192		Gli2 (1)	441.737	344.632	1.28176		Gli2 (1)	708.75	360.278	1.96723		Gli2 (1)	1072.34	698.425	1.53537
	464.379	334.034	1.39021			498.076	330.742	1.50594			441.98	361.061	1.22411			822.811	457.122	1.79998
	416.375	259.661	1.60353			426.702	322.053	1.32494			416.429	250.905	1.65971			884.426	574.778	1.53873
	545	362.178	1.50478			394.227	279.621	1.40986			286.729	291.458	0.983775			402.694	272.681	1.4768
	495.741	281.407	1.76165			395.544	342.676	1.15428			298.933	193.033	1.54861		2	712.98	501.84	1.42073
	250.684	222.939	1.12445			646.25	545.625	1.18442			534.889	436.139	1.22642			765.46	595.13	1.28621
	360.962	278.058	1.29815		2	485.583	405.729	1.19682			457.167	374.333	1.22128		3	1518.93	1114.3	1.36313
2	370.28	273.72	1.35277			1088.5	495.186	2.19816			379.804	320.518	1.18497			1808.4	996.562	1.81463
	373.58	296.72	1.25903			347.596	340.303	1.02143			485.422	324.266	1.49699			1065.67	661.861	1.61011
	317.318	204.523	1.5515			661.233	444.907	1.48623			424.188	385.344	1.1008		4	1369.65	881.167	1.55435
	354.571	202	1.7553			525.753	500.614	1.05022			441.056	334.111	1.32009			1108.71	941.667	1.17739
	270.333	238.1	1.13538			640.545	417.886	1.53282		2	583.02	351.796	1.65727			1230.53	895.833	1.37361
	592.068	333.329	1.77623			577.462	382.231	1.51077			314.104	290.562	1.08102			910.533	711.1	1.28046
	331.926	296.426	1.11976		3	432.103	321.103	1.34568			290.562	381.278	0.762074			1222.18	792.054	1.54305
	485.771	331.514	1.46531			682.587	394.587	1.72988			375	324	1.15741			1577.07	1035.19	1.52346
	424.3	212.5	1.99671			600.469	403.327	1.48879			276.694	255.417	1.0833			1549.46	1028.12	1.50707
	393.354	265.146	1.48354			1181.97	478.339	2.47098			487.167	364	1.33837		5	802.347	816.722	0.982399
	326.419	262.298	1.24446			338.67	296.845	1.1409			271.857	267.375	1.01676			616.833	489.167	1.26099
	220.45	228.15	0.96625			810.604	530.854	1.52698			316.024	249.548	1.26639		6	1565.71	1077.92	1.45254
	591.365	333.406	1.77371		4	551.638	369	1.49495			298.711	324.456	0.920652			335.982	267.357	1.25668
	170.623	160.953	1.06008			556.083	419.958	1.32414			270.238	270.405	0.999382			1049.77	772.3	1.35927
	300.984	244.387	1.23159			557.592	463.845	1.20211			301.929	290.095	1.04079
	203.855	179.582	1.13516			869.571	527.408	1.64876			364.852	352.33	1.03554
	257.981	206.278	1.25065			746.885	600.016	1.24478			387.55	359.817	1.07708
	578.674	265.848	2.17671			425.81	418.048	1.01857			294.944	269.556	1.09418
	346.506	244.228	1.41878			595.522	472.391	1.26065			412.012	359.85	1.14495
	417.348	308.057	1.35478			598.32	447.12	1.33816		3	795.411	371.304	2.14221
	321.667	300.296	1.07117								367.214	360.786	1.01782
											687.48	435.12	1.57998
											518.625	365.736	1.41803

## Sheet: Gli3
.+/+	Cilia	Bckg	Rato		A/+	Cilia	Bckg	Rato		A/A	Cilia	Bckg	Rato		hennin	Cilia	Bckg	Rato
Gli3 (1)	3218.4	2843.47	1.13186		Gli3 (1)	2100.25	1391.17	1.5097		Gli3 (1)	2524.96	2253.53	1.12045		Gli3 (1)	1744.89	1384.04	1.26072
	3014.81	2497.95	1.20691			2206.8	1510.4	1.46107			2109.96	2044.04	1.03225			1259.88	704.44	1.78848
	2787.58	2601.03	1.07172			2600.63	2298.49	1.13145			2348.34	1973.14	1.19016			1737.38	1144.69	1.51778
	2873.54	2881.25	0.997323			2580.6	2220.5	1.16217			2158.89	1812.87	1.19087			2582.04	2045	1.26261
	2320.28	1856.08	1.2501			1699.98	1153.48	1.47379			2179.48	2046.74	1.06485			2511.39	1681.27	1.49374
	3004.21	1871.45	1.60529			1888.45	1603.11	1.17799			1879.22	1693.83	1.10946			2888.71	1670.63	1.72912
	2480.57	1737.9	1.42733			2473.2	2190.57	1.12902			1950.3	1493.74	1.30565			1556.83	861.583	1.80694
	2823.83	2255.08	1.25221			2863.86	2419.09	1.18386			1694.46	1252.07	1.35333		2	2713.01	1712.53	1.58422
	1526.46	1369.3	1.11478			3718.7	3317.73	1.12086			1067.87	982.156	1.08727			2116.91	1427.09	1.48337
	1651.54	1684.29	0.980556			1815.47	1626.3	1.11632			2306.92	1788.23	1.29006			2950.58	2021.96	1.45927
	1128.62	903.833	1.2487			948.467	797.233	1.1897			2364.33	2136.26	1.10676			1302.44	1149.15	1.1334
	2134.76	1813	1.17747			3046.46	2866.32	1.06285			1697.92	1502.6	1.12999			3606	3029.22	1.1904
	2366.2	1694.89	1.39607			2718	1994.5	1.36275			1773.1	1703.39	1.04092			1991.14	1510.32	1.31836
	1998.84	1820.32	1.09807		3	2197.61	2188.44	1.00419			1895.77	1827.88	1.03714		3	887.455	842.727	1.05308
2	2325.05	2021.48	1.15017			2047.38	1656.66	1.23584		2	2274.88	2223.38	1.02316			3095.32	2804.11	1.10385
	2626.5	2367.32	1.10948			2153.03	1995.83	1.07876			1803.34	1649.32	1.09339			3007.41	2013.15	1.49389
	2441.83	1794.61	1.36065			2656.83	2291.81	1.15927			2020.48	1489.52	1.35647			3640.55	2928.85	1.243
	2143.54	1811.33	1.18341			1540.6	1345.43	1.14506			536.694	456.469	1.17575			1895.45	1687.18	1.12344
	1818.52	1591.21	1.14285			1432.1	1049.8	1.36416			1219.18	982.727	1.24061			2440.96	1835.61	1.32979
	2787.73	1731.93	1.60961			3608.36	3468.71	1.04026			1342.69	847.538	1.58423			1443.35	1279.75	1.12784
	2138.93	1603.47	1.33394		4	1781.96	1453.72	1.22579		3	1724.94	1386.71	1.24391			1702.21	1081.21	1.57436
	2233.36	1955.95	1.14183			2034.56	1412.03	1.44088			2328.72	1900.23	1.22549		4	2724.94	1590.62	1.71313
	2287.67	2023.67	1.13046			2270.14	1919.37	1.18276			1951.23	1688.07	1.1559			1961.6	1190.18	1.64816
	2205.41	1843.33	1.19643			1307.13	1256	1.04071			2936.05	1850.9	1.58628			3254.55	2157.42	1.50854
	2400.44	2290.94	1.0478			3437.65	3315.75	1.03676			1740.21	1323.41	1.31494			2382.45	1280.97	1.85988
	2235.33	1856.89	1.20381			1469.44	1126.03	1.30498			2606.35	1749.05	1.49015			2769.07	2156.34	1.28415
	1133.86	1000.17	1.13366			1737.62	1590.76	1.09232			1412.07	1076.77	1.31138			250	240	1.04167
	1559.78	1218.08	1.28052			2062.43	1808.17	1.14062			2791.75	2265.19	1.23246			1435.97	1221.1	1.17597
	2083.38	1872.29	1.11274		5	2340.52	1553.24	1.50687			1772.68	1158.25	1.53048			2140.86	1398.55	1.53078
	2418.73	1359.57	1.77904			3798.94	3187.23	1.19192			1639.6	1059.04	1.54819		5	2274.25	1969.3	1.15485
	2345.86	2195.42	1.06853			2694.17	1723.72	1.56299			1777.25	1607.25	1.10577			2553.22	1397.52	1.82697
	2003.77	1760.48	1.1382			1894.73	1363.93	1.38917			2185.5	1600.25	1.36572			1674.63	960.237	1.74398
	2812.85	2280.41	1.23349			1873.22	1631.25	1.14833			1637.64	1243.18	1.31729			1900.14	1451.38	1.3092
	2074.31	1617.35	1.28254

## Sheet: Sufu
.+/+	Cilia	Bckg	Rato		A/+	Cilia	Bckg	Rato		A/A	Cilia	Bckg	Rato		hennin	Cilia	Bckg	Rato
SUFU (1)	772.155	723.606	1.06709		SUFU (1)	987.824	828.902	1.19173		SUFU (1)	812.6	498.178	1.63114		SUFU (1)	2669.14	1702	1.56824
	660.9	618.58	1.06841			969.208	901	1.0757			758.571	582.257	1.30281			438	402.812	1.08736
	588.282	502.974	1.16961			663.536	555.893	1.19364			1131.95	728.526	1.55375			911.533	871.767	1.04562
	716.06	614.62	1.16505			614.621	547.586	1.12242			948.87	713.13	1.33057			1005.14	752.875	1.33507
	950	858.25	1.1069			713.75	587.5	1.21489			1948.41	1598.31	1.21904			979.25	665.7	1.47101
	1445.47	844.789	1.71105			607.982	475.123	1.27963			604.286	502.571	1.20239			1306.65	900.45	1.45111
	867.051	852.295	1.01731			938.545	811.409	1.15669			618	501.273	1.23286			614.288	520.062	1.18118
	441.25	299.214	1.4747		2	662.562	491.406	1.3483			715.567	465.533	1.53709		2	1081.32	778.48	1.38901
	963.435	791.5	1.21723			1014.22	775.472	1.30788			970.188	648.125	1.49691			1243.5	979.6	1.2694
	668.755	613.623	1.08985			796.86	765.419	1.04108			709.583	658.25	1.07798			1199.79	869.792	1.3794
	773.048	650.095	1.18913			624.44	514.76	1.21307			927.917	735.33	1.26191			854.24	575.48	1.4844
	470.525	467.8	1.00583			700.6	617.675	1.13425			692.625	584.812	1.18435			795.125	505.375	1.57334
	497.625	405.156	1.22823			427.283	421.326	1.01414			931.4	791.8	1.17631		3	1096.12	735	1.49133
	619.95	618.05	1.00307		3	645.756	528.822	1.22112			1691.88	1455.12	1.16271			635.33	518.917	1.22434
	658.762	645.881	1.01994			827.333	460.33	1.79726		2	505.84	432.44	1.16973			520.812	453.312	1.1489
2	858.612	798.102	1.07582			404.543	389.043	1.03984			765	583.5	1.31105			891.25	686.35	1.29854
	1961.04	1788.23	1.09664			880.217	669.043	1.31564			900.75	869.188	1.03631			1446.83	1050.4	1.37741
	1185.52	1084.39	1.09326			1007.71	736.214	1.36878			1039.2	1002.25	1.03687			916.667	893.778	1.02561
	1168.24	1032.3	1.13169			957.759	618	1.54977			477.062	300.688	1.58657		4	847.687	594.633	1.42556
	1300.35	1131	1.14973			903.556	553.278	1.6331			470.1	484.47	0.970339			1446.31	871.188	1.66016
	1588.14	1302.52	1.21928			759.158	574.132	1.32227			744.2	729.667	1.01992			730.938	450.5	1.6225
	1151.2	1011.5	1.13811			756.25	598.75	1.26305			943.5	620.75	1.51994			966.72	597.2	1.61875
	1398.14	1213.57	1.15209			596.053	505.342	1.1795			426.6	417.92	1.02077			994.792	630.208	1.57851
	1215.33	955.109	1.27245			532.1	525.033	1.01346			907	817.2	1.10989		5	798.333	733.306	1.08868
	1138.36	962.057	1.18325			770.724	652.966	1.18034			867.44	566.11	1.53228			707.188	503.938	1.40332
	729.976	699.5	1.04357			621.174	517.652	1.19998			528.92	355.28	1.48874			788.188	417.562	1.8876
	771.795	683.247	1.1296			697.294	498.706	1.39821			913.833	745.233	1.22624			2495.12	1935.42	1.28919
	606.643	566.476	1.07091			646.867	581.7	1.11203		4	890.668	680.25	1.30932			1111.64	751.929	1.47839
	805.695	760.475	1.05946			280.263	257.316	1.08918			440.84	375.4	1.17432			749.222	530.667	1.41185
	933.152	906.545	1.02935			694.516	465.71	1.49131			576.024	544.214	1.05845			797.125	657.188	1.21293
	1113.06	779.51	1.4279			309.48	265.36	1.16626			445.7	346.1	1.28778			550.188	546.25	1.00721
	597	525.156	1.13681			781.053	524.158	1.49011			469.25	467.8	1.0031			1068.88	953.062	1.12152
	916	769.622	1.19019			1246.97	1021.86	1.22029			978.25	720	1.35868
	865.385	731.077	1.18371			480.389	399.889	1.20131			541.062	366.312	1.47705
	3003.28	2357.51	1.27392			695.923	458.615	1.51744			813	700.265	1.16099
	1232.24	1227.06	1.00423			520.258	350.677	1.48358			764.9	681.9	1.12172
	1379.18	961.256	1.43477			334.92	290.66	1.15227			629.16	514.84	1.22205
	1040.88	964	1.07976			301.953	285.212	1.0587			565.562	493.688	1.14559
											608.24	412.16	1.47574

## Sheet: Ptch
.+/+	Cilia	Bckg	Rato		A/+	Cilia	Bckg	Rato		A/A	Cilia	Bckg	Rato		hennin	Cilia	Bckg	Rato
ptCH (1)	814.175	688.446	1.18263		ptCH (1)	711.822	585.603	1.21554		ptCH (1)	692.439	639.195	1.0833		ptCH (1)	545.138	490.724	1.11089
	645.25	588.393	1.09663			640.078	547.402	1.1693			442.368	406.026	1.08951			318.365	313.873	1.01431
	669.25	664.009	1.00789			555.711	490.478	1.133			671.893	635.429	1.05738			701.01	609.373	1.15038
	699.543	681.819	1.026			909.033	782.152	1.16222			681.817	563.549	1.20986			519.381	532.365	0.975611
	634.552	606.129	1.04689			661.752	496.574	1.33264			424.267	402.222	1.05481			586.651	426.326	1.37606
	700.539	679.024	1.03169			560.442	455.662	1.22995		2	760.118	754.412	1.00756			636.347	472.265	1.34744
	625.44	539.405	1.1595			548.683	541.55	1.01317			451.866	409.216	1.10422			873.026	675.158	1.29307
	666.592	626.908	1.0633			684.183	629.233	1.08733			623.368	511.985	1.21755		2	822.729	780.893	1.05357
	585.52	500.382	1.17015			411.118	402.343	1.02181			676.315	580.479	1.1651			594.625	617.597	0.962804
	618	518.993	1.19077			543.508	499.933	1.08716			714.867	712.267	1.00365			921.393	740.933	1.24356
	622.396	561.938	1.10759			724.733	701.783	1.0327			1404.32	1299.41	1.08073			871.331	831.105	1.0484
	467.557	465.934	1.00348		2	726.384	637.709	1.13905			1621.3	1421.03	1.14094			832.212	815.904	1.01999
	532.8	412.422	1.29188			750.818	602.744	1.24567			1292.31	1257	1.02809			699	668.234	1.04604
	601.988	545.93	1.10268			681.402	644.385	1.05745			1192.57	1098.1	1.08602			805.099	762.352	1.05607
	588.48	561.94	1.04723			685.691	588.062	1.16602			1262.89	1185.58	1.06521			695.059	613.916	1.13217
2	604.922	557.875	1.08433			612.841	496.374	1.23464			1548.13	1480.84	1.04545		3	662.269	526.308	1.25833
	630.007	552.275	1.14075			651.512	595.876	1.09337			947.778	883.857	1.07232			583.979	567.638	1.02879
	616.507	587.658	1.04909			497.053	494.368	1.00543		3	1420.58	1344.28	1.05676			447.356	443.437	1.00884
	534.94	521.321	1.02612			835.442	784.302	1.0652			1539.29	1487.5	1.03481			624.956	559.933	1.11613
	734	577.976	1.26995		3	486.734	409.436	1.18879			1201.79	1089.16	1.10341			552.837	473.023	1.16873
	513.921	551.719	0.93149			551.732	514.732	1.07188			1245.89	1179.91	1.05592			459.882	397.054	1.15824
	559.882	546.008	1.02541			698.458	580.25	1.20372		4	1320.27	1252.77	1.05388		4	557.595	458.839	1.21523
	641.105	543.649	1.17926			452.476	397.362	1.1387			810.298	822.947	0.98463			545.551	458.802	1.18908
	641.641	622.077	1.03145			1037.36	702.314	1.47705			643.983	601.517	1.0706			735.096	525.102	1.39991
	512.473	483.588	1.05973			1373.61	1345.62	1.02079			628.304	542.679	1.15778			579.277	485.66	1.19276
	414.532	385.213	1.07611		4	654.641	502.816	1.30195			852.225	826.577	1.03103			539.542	495.065	1.08984
	607.238	564.923	1.0749			606.988	544.788	1.11417			616.045	579.91	1.06231			492.897	454.411	1.08469
	697.633	652.36	1.0694			429.239	403.866	1.06283			664.377	621.87	1.06835			575.122	513.902	1.11913
3	567.931	520.069	1.09203			544.895	521.754	1.04435			761.576	641.12	1.18788			637.811	542.434	1.17583
	684.952	647.24	1.05827			731.306	557.194	1.31248			659.291	570.267	1.15611			591	534.189	1.10635
	636.427	567.354	1.12175			747.865	572.231	1.30693			884.796	608.648	1.45371			591.25	418.327	1.41337
	708.211	646.835	1.09489			677.944	635.475	1.06683		5	797.767	712.589	1.11953			352.413	313.669	1.12352
	791.307	639.2	1.23796			529.048	514.694	1.02789			1031.77	902.886	1.14275			495.191	443.924	1.11549
	882.6	832.3	1.06043		5	664.189	635.779	1.04469			686.486	652.784	1.05163			455.935	450.63	1.01177
	777.846	723.603	1.07496			565.014	513.084	1.10121			636.368	606.977	1.04842		5	506.007	410.232	1.23347
	812.762	686.77	1.18346			449.838	444.529	1.01194			729.656	619.413	1.17798			619.617	472.737	1.3107
	727.443	678.264	1.07251			395.358	352.963	1.12011			692.333	562.333	1.23118			619.928	597.036	1.03834
	640.655	579.94	1.10469			481.863	467	1.03183			509.714	515.714	0.988366			604.908	482.337	1.25412
	665.243	634.189	1.04897
	814.379	739.121	1.10182

## Sheet: Arl3
.+/+	Cilia	Bckg	Rato		A/+	Cilia	Bckg	Rato		A/A	Cilia	Bckg	Rato		hennin	Cilia	Bckg	Rato
1	2108.51	1698.78	1.24119		1	2302.12	1927.16	1.19457		1	1859.67	1674.83	1.11037		1	1559.81	1447.19	1.07781
	1962.04	1211.81	1.6191			1808.15	1634.62	1.10616			958.453	818.453	1.17105			2520.23	2338.06	1.07791
	1832.71	1655.94	1.10675			2556.56	1819.53	1.40506			1584.78	1472.22	1.07646			2518.08	2168.93	1.16098
	2633.42	1994.23	1.32052			2109.49	1702.39	1.23913			2395.89	2359.74	1.01532			1186.51	836.196	1.41894
	2393.03	1542.6	1.5513			2505.18	2039.13	1.22855			1990.11	1654.07	1.20316			1040.58	938.948	1.10824
	1504.82	933.931	1.61128			3512.14	2411.95	1.45614			2213.59	2038.24	1.08603		2	1096.85	1070.04	1.02506
	1029.25	710.323	1.44899			3445.7	2275.57	1.51422			1984.86	1890.86	1.04971			2540.78	2156	1.17847
	1420.19	820.314	1.73127			1388.23	800.034	1.73521		2	1541.79	1569.7	0.982216			1110.95	1091.02	1.01827
	1521.06	1115.49	1.36357			2003.52	1870.8	1.07094			957.583	839.562	1.14057			1474.15	1202.85	1.22555
	1618.37	1323.53	1.22277			2446.26	1371.12	1.78414			2037.17	1842.23	1.10582			1693.83	1465.59	1.15573
	2972.59	2529.78	1.17504			2038.55	1853.48	1.09985			1649.83	1429.8	1.15389			1140.4	1010.07	1.12903
	2063.86	1425.33	1.44799			1942.7	1783.72	1.08913			646.059	543.745	1.18817			1430.93	1459.77	0.980245
2	2516.87	1858.2	1.35447			1504.36	1349.82	1.11448			2295.84	2235.56	1.02696		3	2100.52	2060.41	1.01947
	3340.13	2625.65	1.27212			2902.42	2389.24	1.21479		3	3641.53	3153.42	1.15479			2867.85	2726.92	1.05168
	2837.7	2004.1	1.41595			3386.69	2230.2	1.51856			1671.03	1304.97	1.28051			2178.3	2161.8	1.00763
	3163.02	2253.25	1.40376			2578.02	1955.24	1.31852			1787.35	1463.9	1.22096			1315.33	1336.11	0.984449
	2542.09	1865.61	1.36261			982.603	793.676	1.23804			2401.7	2121.2	1.13224			986.464	713.143	1.38326
	1835.87	1213.84	1.51245		2	2793.55	2302.45	1.2133			2358.4	2136.61	1.1038			2284.02	2261.43	1.00999
	1023.93	780.066	1.31262			3004.74	2534.54	1.18552			2725.2	2014.8	1.35259		4	1174.49	922.067	1.27376
	1263.72	970.185	1.30256			2351.19	1702.04	1.38139			1283.42	1295.55	0.990641			1243.09	1175.3	1.05768
	1828.19	1497.5	1.22083			2775.41	2268.96	1.22321			1347.7	1253.46	1.07519			487.453	381.726	1.27697
	2338.42	1497.55	1.5615			2598.9	2022.96	1.2847			1601.36	1250.36	1.28072			2167.12	1961.51	1.10482
	1764.25	1376.46	1.28173			2130.43	1938.77	1.09885			1198.92	1015.18	1.18099			1173.56	1054.39	1.11302
3	2450.65	1545.57	1.5856		3	3513.48	2506.48	1.40176			1569.77	1440.03	1.0901		5	1551.78	1381.32	1.1234
	1264.83	992.3	1.27465			3169.83	2240.21	1.41497		4	1831.74	1791.44	1.02249			2279.84	2569.96	0.887114
	1439.64	1051.36	1.36932			1723.57	951.543	1.81134			1806.13	1735.17	1.04089			1045.1	981.325	1.06499
	1008.22	904.295	1.11492			3221.04	2507.12	1.28476			1351.05	1209.43	1.11709			1693.14	1548.4	1.09348
	1617.74	860.88	1.87917			2296.34	1958.72	1.17236			1955.51	1881.24	1.03948			1702.08	1689.42	1.00749
	1799.53	888.828	2.02461			1530.44	1115.53	1.37194			1791.45	1475.37	1.21424		6	1102.2	993.057	1.10991
	787.093	688.315	1.14351			1511.22	973.543	1.55229			2115.8	1946.14	1.08718			1696	1569.32	1.08072
	1899.37	1192.88	1.59226			2498.11	1364.28	1.83109			2202.36	2123.03	1.03737			2704.19	2842.38	0.951383
	2289.8	1911.86	1.19769			2576.88	1808.06	1.42522		5	1903.85	1682.95	1.13126			1456.88	1289.62	1.1297
	2919.25	1932.95	1.51025		4	1694.8	1134.43	1.49396			2985.19	2705.5	1.10338			1791.57	1805.26	0.992419
4	2487.35	1642.52	1.51435			2157.23	1572.29	1.37203			3415.6	3365.34	1.01493			968.924	890.354	1.08825
	1537.9	1082.52	1.42067			604.319	322.468	1.87404			1874.37	1821.67	1.02893			1962.36	1800.67	1.08979
	1719.49	808.557	2.12662			2847.59	2222.52	1.28124			2810.93	2745.04	1.024
	1392.69	894.378	1.55716			2464.39	1726.36	1.42751			2034.9	1892.97	1.07497
	1746.9	1177.68	1.48334			2074.72	1665.3	1.24586			1439.06	1429.64	1.00659
	1261.3	787.68	1.60128			1629.8	1058.57	1.53963			1402.74	1149.33	1.22048
	978.111	600.033	1.6301			2244.77	1580.51	1.42028			2223.84	1966.67	1.13077
	1744.59	827.821	2.10745			2468	1689.67	1.46064			823.815	760.722	1.08294
	1009.35	716.243	1.40923			1385.55	710.438	1.95027			1796.9	1712.71	1.04916
	1649.25	1066.08	1.54703			1416.22	1105.87	1.28064			3037.72	2641.87	1.14984
						2178.04	1760.61	1.23709			1823.74	1809.93	1.00763

## Sheet: Inpp5e
.+/+	Cilia	Bckg	Rato		A/+	Cilia	Bckg	Rato		A/A	Cilia	Bckg	Rato		hennin	Cilia	Bckg	Rato
File (1)	3015.38	2437.09	1.23728		File (1)	930.589	815.877	1.1406		File (1)	2827.34	2855.22	0.990236		File (1)	2125.65	2165.35	0.981665
	2997.45	2142.77	1.39887			1378.05	990.6	1.39113			1813	1778.7	1.01928			2807.94	2886.2	0.972885
	2843.77	2327.45	1.22184			1968.14	1304.4	1.50885			1728.48	1585.4	1.09025			2399.07	2468.1	0.972033
	3315.56	2858.38	1.15995			1099.53	1046.68	1.0505			3172.24	2835.56	1.11874			2696.53	2716.47	0.992663
	3463.29	3352.36	1.03309			1539.9	1161.96	1.32526			2201.08	1935.81	1.13704			2481	2357.33	1.05246
	3742.6	3284.56	1.13945			1512.87	1109.83	1.36316			3002.82	2905.69	1.03342			2246.59	2453.46	0.915682
	3903.15	3718.72	1.04959			1799.64	1336	1.34704		2	1390.19	1322.98	1.0508		2	2014.1	1717.59	1.17263
	3243.67	2838.59	1.1427			1248.65	1084.69	1.15116			1420.17	1446.2	0.981999			3048.99	3094.63	0.985251
	2238.29	2077.61	1.07734			1385.93	955.409	1.45062			1632.47	1551.77	1.05201			1893.13	1755.67	1.0783
	1942.14	1821.9	1.066			1988.39	1555.99	1.2779			2304.41	2210.23	1.04261			2535.93	2267.16	1.11855
3	3556.11	2669.45	1.33215			1071.63	887.295	1.20775			1808.32	1794.74	1.00757		3	3146.74	2650.48	1.18724
	3347.06	3132.88	1.06836			1017.02	930.348	1.09316			1856.3	1696.59	1.09413			3045.57	3054.84	0.996964
	3184.17	2702.51	1.17823			1130.43	1058.73	1.06772			2821.59	2850.09	0.99		4	3119.64	3050.25	1.02275
	4090.47	3128.85	1.30734			1589.68	1428.53	1.11281			2155.08	2328.08	0.92569			3042.28	2876.03	1.0578
	3383.7	3034.89	1.11494		2	1510.65	1175.6	1.285			2813.39	2500.72	1.12503			2409.93	2145.16	1.12342
	2878.11	2685.37	1.07177			1724.05	1259.64	1.36869			1353.28	1345.4	1.00585			521.868	450.527	1.15835
	2963.5	2441.28	1.21391			1048.68	975.244	1.0753			1080.21	971.778	1.11158		5	1693.57	1442.25	1.17425
	3172.43	2858.72	1.10974			1861.26	1430.16	1.30143		3	1820.67	1844.43	0.987117			3054.82	2755.59	1.10859
	2745.71	1769.09	1.55205			1928.9	1389.86	1.38784			2125.31	2115.79	1.0045			2170.12	1889.7	1.1484
	2324.55	1807.69	1.28592			2379.06	2222.58	1.0704			2517.53	2288.68	1.09999			2407.43	2368.92	1.01626
	2700.55	2816.04	0.958989			2133.29	1713.92	1.24468			1435.71	1339.5	1.07182		6	2658.54	2659.54	0.999624
	3281.52	2743.67	1.19604			1177.95	1035.61	1.13745			2920.86	2778.73	1.05115			2831	2781.73	1.01771
3	2270.05	1579.3	1.43738			1522.3	1426.16	1.06741			2085.66	2170.09	0.961096			3438.11	3527.94	0.974538
	2075.52	1510.39	1.37416			1255.54	947.667	1.32488			2019.65	1798.92	1.1227			3006.84	3007.16	0.999891
	3739.7	3212.89	1.16397			1106	952.311	1.16139			1703.51	1598.49	1.0657		7	2200.03	2069.63	1.06301
	2472.87	2180.87	1.13389			1985.57	1201.57	1.65248		4	2677.18	2532.35	1.05719			1048.37	983.111	1.06638
	2344.82	2138.26	1.0966			1472.41	1103.77	1.33399			1677.8	1544.19	1.08653			1976.28	1963.13	1.0067
	3866.15	3478.39	1.11148			1627.66	1330.21	1.22361			1949.09	1863.61	1.04587		8	2136.13	2221.31	0.961653
	3710.42	2775.66	1.33677		4	1519.86	952.603	1.59548			1238.97	1170.09	1.05886			3346.89	3230.57	1.03601
	3871	3049.79	1.26927			1191.15	992.356	1.20033			2687.91	2593.74	1.03631			1831.61	1582.86	1.15716
	3019.68	2859.29	1.05609			1486.86	1172.47	1.26814		5	2319.16	2401.09	0.965877			1885.82	1698.6	1.11022
	2930.19	2702.53	1.08424			1297.5	1123.87	1.15449			2782.26	2625.37	1.05976			1012.15	1047.17	0.966553
	3517.3	2502.39	1.40558			978.872	940.179	1.04115			2492.78	2277.39	1.09458			1891.15	1910.77	0.989733
	3609.62	2793.15	1.29232			859.438	792.688	1.08421			2494.48	2375.07	1.05028			3398.95	3140.03	1.08246
	2536.96	2181.51	1.16294			1172.44	879.406	1.33322			1677.88	1565.88	1.07153			3218.74	3047.94	1.05604
	2889.36	2148.52	1.34481			943.815	862.333	1.09449			1976.62	1996.46	0.990059			2135.97	1888.75	1.13089
4	2088.66	1920.27	1.08769			1665.3	1444.91	1.15253			1718.76	1777.2	0.967117			2411.38	2409.25	1.00088
	2145.49	1732.49	1.23838			1092.93	815.69	1.33989			2381.86	2359.5	1.00948			2553.85	2364.19	1.08022
	3128.95	2248.42	1.39162			934.823	932.919	1.00204			1622.17	1669.7	0.971539			1596.96	1668.11	0.957348
	2436.02	1898.2	1.28333			843.843	752.825	1.1209								2742.71	2854.07	0.96098
	2787.54	2114.29	1.31843
			1.20743					1.23773					1.04116					1.04635

## Sheet: Smoothened
Treatment	Genotype
FBS	.+/+	SMO	Background	Ratio		A/+	Smo	Background	Ratio		A/A	SMO	Background	Ratio		hennin	SMO	Background	Ratio
	1	520.419	425.419	1.22331		1	377.425	255.149	1.47923		1	277.621	202.429	1.37145		1	499.853	318.412	1.56983
		373.934	341.604	1.09464			553.141	490.199	1.1284			377.528	347.137	1.08755			499.853	259.577	1.92564
		344.573	330.006	1.04414			542.496	496.968	1.09161			359.305	330.325	1.08773			248.754	164.284	1.51417
		356.289	331.628	1.07436			452.217	383.089	1.18045			302.669	250.62	1.20768			719.4	484.92	1.48354
		498.734	380.815	1.30965			388.679	307.98	1.26203			291.716	273.779	1.06552			806.967	587.333	1.37395
		352	320.083	1.09971			444.204	347.204	1.27937			419.5	297.448	1.41033			733.913	360.304	2.03693
		375.484	335.679	1.11858			426.639	243.594	1.75143			317.043	279.713	1.13346			424.415	246.929	1.71877
		416.191	335.975	1.23876			353.485	289.842	1.21958			333.854	270.785	1.23291			317.587	230.573	1.37738
		277.535	267.22	1.0386			475.233	340.005	1.39772			536.927	525.537	1.02167			527.762	305.81	1.72578
		610.686	386.878	1.5785			385.434	292.74	1.31664			477.868	385.033	1.24111			624.634	380.683	1.64082
	2	417.985	380.489	1.09855		2	418.325	364.897	1.14642		2	326.397	267.922	1.21825		2	612.654	517.068	1.18486
		491.031	457.18	1.07404			416.202	321.286	1.29543			362.815	347.315	1.04463			537.725	394.716	1.36231
		337.205	275.41	1.22437			495.863	396.679	1.25004			482.267	414	1.1649			536.355	451.594	1.18769
		331.025	299.718	1.10445			308.403	231.918	1.32979			468.429	447.29	1.04726			483.427	370.54	1.30466
		298.168	249.802	1.19362			335.127	286.764	1.16865			272.368	259.374	1.0501			366.941	173.838	2.11082
		426.906	327.506	1.30351			378.577	330.151	1.14668			529.337	484.808	1.09185			598.234	469.516	1.27415
		369.729	219.688	1.68297			239.218	212.069	1.12802			283.133	249.833	1.13329			684.41	551.019	1.24208
		306.412	240.236	1.27546			347.623	218	1.5946			341.923	328.282	1.04155			497.222	245.689	2.02379
		336.871	285.244	1.18099			418.926	338.333	1.23821			372.818	329.818	1.13037			612.011	464.565	1.31739
		287.884	236.42	1.21768			474.75	416.139	1.14084			537.815	293.123	1.83478			476.795	364.068	1.30963
	3	431.838	381.548	1.13181		3	365.951	295.568	1.23813		3	235.39	229.9	1.02388		3	266.305	196.105	1.35797
		394.114	321.036	1.22763			380.667	356.63	1.0674			368.209	336.705	1.09357			442.246	342.8	1.2901
		401.418	362.163	1.10839			406.562	316.46	1.28472			386.762	358.218	1.07968			391.553	312.919	1.25129
		472.095	322.183	1.4653			356.761	299.493	1.19122			341.073	314.95	1.08294			498.067	308.717	1.61334
		519.58	443.333	1.17199			294.195	217.208	1.35444			405.514	333.848	1.21467			231.941	164.87	1.40681
		263.246	248.46	1.05951			575.369	413.766	1.39057			583.019	391.024	1.49101			220.392	159.51	1.38168
		409.859	357.571	1.14623			302.55	262.357	1.1532			508.654	492.721	1.03234			515.35	433.32	1.18931
		583.677	431.491	1.3527			552.736	506.248	1.09183			321.794	246.67	1.30455			534.875	369.773	1.4465
		390.177	348.54	1.11946			512.261	416.529	1.22983			293.466	213.552	1.37421			329.6	275.522	1.19627
		562.794	550.504	1.02232			392.791	291.227	1.34875			244	215.756	1.13091			481.932	241.045	1.99934
	4	332.06	290.184	1.14431		4	331.686	307.575	1.07839		4	426.213	415.814	1.02501		4	458.728	287.349	1.59641
		458.695	423.797	1.08235			430.659	306.883	1.40333			500.606	437.761	1.14356			562.577	427.602	1.31566
		225.521	177.972	1.26717			452.406	265.17	1.7061			297.985	272.653	1.09291			600.995	549.574	1.09357
		453.632	407.912	1.11208			491.367	353.126	1.39148			459.835	384.835	1.19489			611.025	515.907	1.18437
		352.629	240.028	1.46912			571.341	443.222	1.28906			588.366	490.077	1.20056			463.119	319.4	1.44997
		414.554	331.192	1.2517			467.896	429.162	1.09025			664.969	649.504	1.02381			315.456	304.605	1.03562
		369.141	267.141	1.38182			344.178	309.398	1.11241			436.028	381.955	1.14157			312.427	254.878	1.22579
		225.293	180.776	1.24626			390.869	370.805	1.05411			427.344	329.836	1.29563			391.497	260.104	1.50516
		291.431	259.146	1.12458			327.678	253.215	1.29407			450.423	341.317	1.31966			371.526	317.098	1.17164
		239.8	185.963	1.2895			180.489	174.933	1.03176			477.918	396.231	1.20616			473.566	376.131	1.25905
Treatment	Genotype
SHH	.+/+	Smo	Background	Ratio		A/+	Smo	Background	Ratio		A/A	Smo	Background	Ratio		hennin	Smo	Background	Ratio
	1	477.934	325.967	1.4662		1	433.808	369.507	1.17402		1	950.5	802.333	1.18467		1	1128.19	724.151	1.55795
		472.922	259.247	1.82421			608.926	396.324	1.53643			711.671	474.932	1.49847			737.979	437.915	1.68521
		692.531	477.388	1.45067			429.467	358.72	1.19722			299.511	270.6	1.10684			988.2	453.1	2.18098
		827.621	349.667	2.36688			764.556	484.016	1.57961			429.224	414.245	1.03616			843.929	563.357	1.49804
		608.737	391.158	1.55624			300.204	218.5	1.37393			540.683	517.341	1.04512			1299.74	746.319	1.74154
		502.96	337.573	1.48993			361.794	244.464	1.47995			764.289	469.422	1.62815			529.291	344.436	1.53669
		423.022	398.03	1.06279			449.117	267.867	1.67664			498.744	388.897	1.28246			659.312	363.25	1.81504
		445.976	367.216	1.21448			561.281	276.438	2.0304			486.333	361.911	1.34379			788.047	538.469	1.4635
		685.188	499.859	1.37076			438.317	328.122	1.33584			673.275	513.812	1.31035			703.738	477.488	1.47383
		488.809	336.426	1.45295			369.741	157.519	2.34728			677.281	503.797	1.34435			569.559	387.5	1.46983
		363.843	306.745	1.18614			497.921	341.762	1.45692			543.434	431.952	1.25809			503.825	320.25	1.57322
		597.282	381.583	1.56527			517.434	328.566	1.57483			794.568	623.432	1.27451			949.843	454.02	2.09207
		822.162	371.622	2.21236			328.97	144.37	2.27866			958.524	578.143	1.65794			952.879	689.707	1.38157
		480.69	321.286	1.49614			438.043	326.957	1.33976			720.108	491.431	1.46533			1000.12	643.077	1.5552
		500.902	227.412	2.20262			766.639	389.194	1.96981			848.323	613.032	1.38382			741.683	523.733	1.41615
		584.086	305.481	1.91202								765.75	545.583	1.40354			856.848	437.283	1.95948
	2	568.215	435.304	1.30533		3	607.16	290.136	2.09267			516.433	379.552	1.36064			978.019	470.932	2.07677
		492.908	349.855	1.40889			623.029	534.654	1.16529			832.588	420.157	1.98161			1827.24	590.873	3.09244
		360.32	298.553	1.20689			690.782	393.218	1.75674			843	537.024	1.56976			964.6	512.4	1.88251
		406.717	336.2	1.20975			652.447	386.579	1.68775			659.148	522.84	1.26071			925.246	446.098	2.07409
		700.086	555.183	1.261			397.47	307.504	1.29257			730.822	545.178	1.34052			967.875	415.25	2.33082
		605.82	392.98	1.54161			499.24	400.34	1.24704			567	397.868	1.4251			1112.92	571.567	1.94715
		440.072	289.108	1.52217			619.155	475.052	1.30334		2	564.32	238.52	2.36592			467.674	183.152	2.55347
		574	296.476	1.93608			407.561	321.902	1.2661			639.711	342.395	1.86834			833	601.414	1.38507
		652.864	454.971	1.43496			694.5	411.511	1.68768			510.87	344.148	1.48445			816.722	391.241	2.08752
		461.059	368.059	1.25268			839.426	475.082	1.76691			877.51	471.48	1.86118			905.627	460.187	1.96795
		320.636	277.475	1.15555			664.493	471.71	1.40869			769.556	446.667	1.72289			1185.9	639.268	1.85509
		358.091	261.273	1.37056			713.768	539.214	1.32372			541.667	363.467	1.49028			1324.69	891.062	1.48664
	3	342.178	235.347	1.45393			364.177	355.797	1.02355			547.296	396.148	1.38154			1124.8	753.732	1.49231
		658.791	394.941	1.66807			1009.31	454.095	2.22269			841.561	401.47	2.0962			609.314	430.2	1.41635
		542.082	386.902	1.40108			968.488	695.093	1.39332			813.66	570.8	1.42547			650.022	432.6	1.50259
		652.868	413.094	1.58043	32		642.283	415.163	1.54706			827.226	465.871	1.77565			815.348	389.985	2.09072
		573.368	416.068	1.37806			749.34	440.213	1.70222			942.106	506.564	1.8598			838.4	591.143	1.41827
		450.44	321.896	1.39933			1324.16	437.291	3.02811			745.292	455.723	1.63541		3	915.317	438.39	2.08791
		411.367	250.067	1.64503			560.068	403.5	1.38802			617.941	355	1.74068			1022.31	598.455	1.70825
		807.143	518.571	1.55648			842.556	535.5	1.5734			863.04	409.9	2.10549			842.607	585.429	1.4393
		617.69	446.034	1.38485			516.708	338.681	1.52565			527.019	336.167	1.56773			1451.46	1102.14	1.31694
		702.64	413.404	1.69964			839.377	606.098	1.38489			476.636	330.523	1.44207			1061.18	716.409	1.48125
		908.837	420.913	2.1592			1004.31	452.694	2.21853			525.175	471.675	1.11343			793.645	481.339	1.64883
		612.487	496.256	1.23422			432.216	346.569	1.24713			658.235	504.271	1.30532			1091.15	756.043	1.44324
							605.283	292.783	2.06734			582.593	444.136	1.31174			593.596	283.035	2.09725
																4
