# Supplementary material for: ARL13B regulates Sonic hedgehog signaling from outside primary cilia
Source: eLife. 2020 Mar 4;9:e50434. doi: 10.7554/eLife.50434 (PMC7075693; doi:10.7554/eLife.50434)
Supplement: Figure 6—source data 1. [file elife-50434-fig6-data1.xlsx]

## Sheet: Ciliation Rate
% Ciliated
Genotype	.+/+	.A/+	.A/A	hnn/hnn
	67.9	67.7	67.3	490.5
Exp 1.	76	75	46	50
Exp 2.	78	71	42	46
Exp 3.	54	88	51	51
Exp 4.	84	76	31	63
Exp 5.	73	63	53	54
Average	73	74.6	44.6	52.8

## Sheet: Cilia Length
.+/+	Length (um)		A/+	Length (um)		A/A	Length (um)		hennin	Length (um)
FBS CTRL (1)	3.096		FBS CTRL (1)	2.93		FBS CTRL (1)	1.686		FBS CTRL (1)	3.316
	3.833			2.573			1.805			2.266
	2.415			2.682			1.334			2.935
	3.187			3.269			1.787			3.247
	2.855			2.289			1.582			2.49
	3.088			2.255			1.399			1.25
	3.972			3.277			1.646			1.044
	2.617			2.798			1.667			2.155
	3.101			1.561			1.062			1.818
	4.184			2.396			3.006			2.566
	3.211			2.41			1.992			3.45
	1.935			2.12			1.777			1.612
	1.796			2.991			1.231			1.063
	2.195			3.421			2.421			1.639
	1.575			2.255			3.237			2.529
	2.955			2.153			2.657			1.382
	1.968			2.441			2.351			3.336
	2.423			2.601			2.398			1.226
	2.402			3.45			1.91			3.549
	1.968			2.966			1.392			1.982
	1.968			2.594			1.741			1.965
	2.925			2.612			1.809			1.692
	2.925			1.146			1.529			3.771
	2.911			2.885			1.201			3.065
-2	2.571			2.809			1.563			1.338
	2.86			3.047			1.523			1.83
	2.428			3.212			1.483			1.245
	3.166			3.491			1.105			2.54
	5.374			3.294			1.529			1.356
	3.056			2.712		-2	2.265			1.395
	3.482			2.951			1.912			1.51
	3.143			2.583			2.385			0.463
	2.072			2.023			2.443			1.451
	2.197			1.243			3.345			1.606
	2.613			1.761			1.544			1.232
	2.037			1.761			1.007		2	2.832
	2.145			1.564			2.316			1.676
3	2.92			2.544			1.351			3.256
	2.53		2	1.853			1.465			3.125
	3.649			3.785			1.871			3.236
	3.623			3.549			2.342			2.279
	2.597			2.657			4.261			1.699
	3.598			2.989			2.04			2.514
	4.711			3.09			1.647			3.359
	1.475			2.433			2.271			2.416
	2.944			3.672			1.337			0.964
	2.851			1.91			0.942			0.709
	3.884			1.609			1.693			3.956
	2.877			1.367			2.097			1.799
	3.078			0.57			2.06			1.241
	2.377			2.768			2.549			2.45
	2.708			2.252			1.402			1.899
	3.904			3.051			2.111			1.317
	3.368			1.967			1.437			1.556
	3.506			3.009			2.077			1.943
	2.739			1.869			1.315			1.924
	3.372			1.706			0.618			3.588
	1.491			2.141			1.465			4.388
	2.293			2.62			1.461			1.905
	1.714			1.977			1.077			2.721
	2.566			1.822			2.237			1.041
	1.93			1.761			2.319			1.982
	3.015			1.991			2.652			1.905
	3.869			2.196			1.031			1.977
	2.065			1.935			1.992			3.042
	1.993			0.695			1.27			3.065
	2.914			1.953			2.143		3	2.088
	3.075			2.228			2.079			1.585
	3.215			0.546			2.151			2.014
	4.196			3.112			2.348			1.587
	4.687			2.641			1.442			1.015
3	1.31			3.02			2.697			0.83
	2.412		3	4.82			1.623			2.794
	3.71			2.032			0.699			1.442
	3.958			2.823			3.387			1.592
	3.305			3.186			3.069			2.472
	3.245			2.284			1.943			1.655
	3.568			2.76			1.344			2.252
	3.418			1.402			1.226			2.636
	2.57			3.071			1.664			1.504
	2.337			3.333			2.279			1.465
	2.548			3.189			3.742			2.706
	2.154			3.536			2.363			2.812
	2.135			3.174			0.984			1.915
	2.602			1.959			2.349			2.42
	2.328			3.43			1.711			0.816
	2.281			3.566			1.16			2.29
	2.387			2			2.317			1.98
	2.072			4.746			1.491			2.136
	2.085			1.465			1.457			2.402
	2.989			3.447			0.977			1.556
	1.857			1.893			2.09			1.599
	3.298			3.283		3	4.302			2.06
	3.085			2.281			2.227			1.51
	2.78			3.125			2.578			2.008
	2.423		4	3.251			2.129			0.993
	1.257			2.529			1.727		4	3.154
	3.907			3.662			0.819			3.36
	2.007			3.011			2.54			1.928
	3.135			5.64			2.275			2.38
	2.473			2.641			1.231			3.856
	2.594			2.183			1.274			1.019
	1.791			1.546			2.59			2.025
	2.072			1.59			1.638			2.264
	2.766			1.58			0.934			3.023
	1.671			3.767			2.292			1.767
	1.899			2.662			1.782			3.112
	2.326			5.574			1.523			1.517
	4.419			5.721			2.013			0.622
	1.843			2.647			3.15			1.424
	2.099			2.974			3.292			1.818
	1.914						1.722			2.848
	1.659						3.401			3.601
	1.209						1.758			1.217
	1.709						1.188			2.571
	1.725						1.546			2.783
	2.94						1.977			1.824
	2.353						1.953			2.264
	2.423						1.575			1.626
	1.285						0.926			3.702
	1.772									2.989
										3.115
										1.432
										1.683
										2.83
										3.517
										2.29
										2.584
										1.761
										1.815
avg	2.69825			2.627			1.90439			2.14564
stdev	0.797698			0.920892			0.700193			0.818967
