# Supplementary material for: ARL13B regulates Sonic hedgehog signaling from outside primary cilia
Source: eLife journal article supplement (doi:10.7554/elife.50434), 2020-03-04

$\alpha$ -Actub ARL13B (NM)

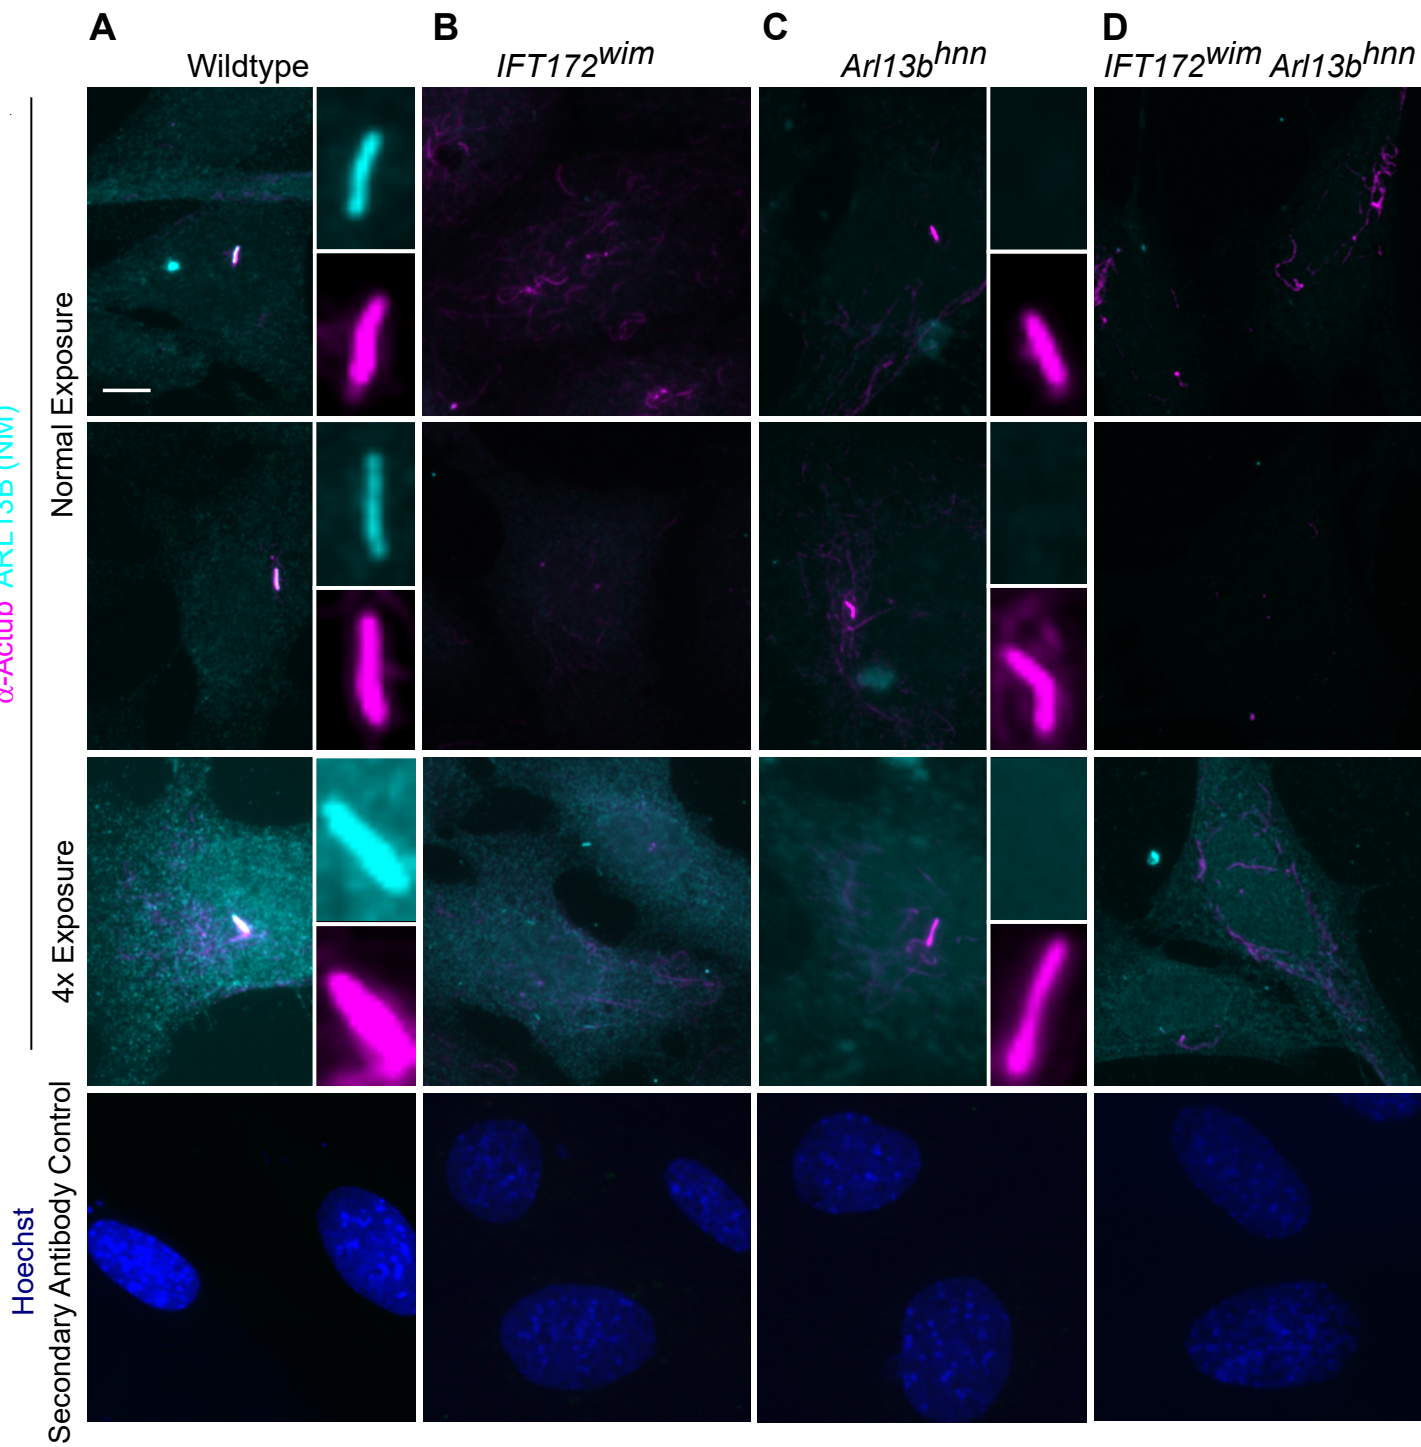

Supplement: supp [file elife-50434-supp-v1.zip]
