# Supplementary material for: ARL13B regulates Sonic hedgehog signaling from outside primary cilia
Source: eLife journal article supplement (doi:10.7554/elife.50434), 2020-03-04
Supplement: supp [file elife-50434-supp-v1.zip]

*Arl13b*<sup>+/+</sup>

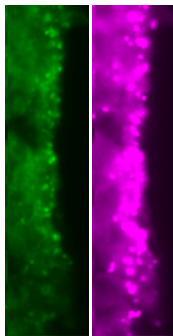

*Arl13b*<sup>A/A</sup>

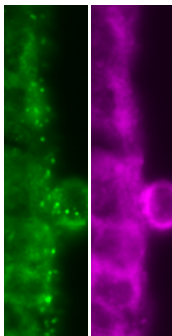

*Arl13b*<sup>hnn/hnn</sup>

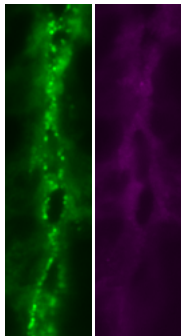

IFT88 ARL13B
